# Supplementary material
Source: Springer Nature journal article supplement (https://www.springermedizin.de/resource/supplementary/13075_2009_2700_MOESM6_ESM.pdf/9692678)

IP: integrin  $\alpha$ V $\beta$ 3

**A**

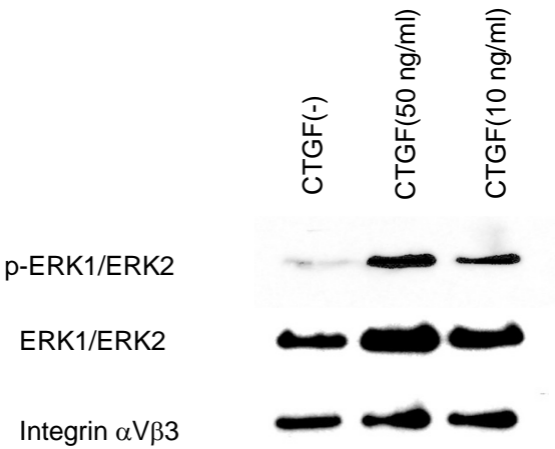

**B**

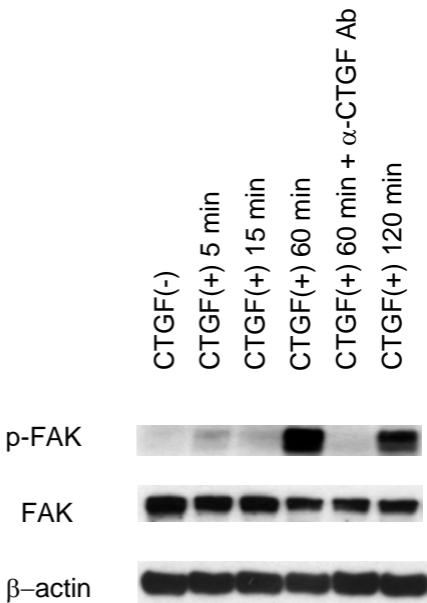

Supplement: MOESM6 [file 9692678]
